# Supplementary material
Source: Springer Nature journal article supplement (https://www.springermedizin.de/resource/supplementary/12885_2013_4200_MOESM1_ESM.pdf/9465764)
Supplement: MOESM1 [file 9465764]

**Correlation coefficients of the most differentially regulated tumor genes  
and clinicopathological parametres**

| Gene symbol | Postoperative survival |          | Tumor size |          | Intestinal subtype |          | Lymph node metastasis |          |
|-------------|------------------------|----------|------------|----------|--------------------|----------|-----------------------|----------|
|             | Pearson                | Spearman | Pearson    | Spearman | Pearson            | Spearman | Pearson               | Spearman |
| ADA         | -0.633                 | -0.604   |            |          |                    |          |                       |          |
| ADH1C       |                        |          |            | -0.578   |                    |          |                       |          |
| AGXT2I1     | -0.684                 | -0.595   |            |          |                    |          |                       |          |
| ANGPTL3     | -0.702                 | -0.656   |            |          |                    |          |                       |          |
| APLP1       | -0.740                 | -0.635   |            |          |                    |          |                       |          |
| AQP4        | -0.692                 | -0.582   |            |          |                    |          |                       |          |
| B3GAT1      | -0.724                 | -0.721   |            |          |                    |          |                       |          |
| C6ORF58     |                        |          |            | -0.569   |                    |          |                       |          |
| CAPN9       |                        |          |            |          |                    | -0.651   |                       |          |
| CCDC121     |                        | -0.563   |            |          |                    |          |                       |          |
| CHIA        | -0.608                 | -0.565   | 0.566      |          |                    |          |                       |          |
| CKM         | -0.626                 | -0.604   |            |          |                    |          |                       |          |
| CLCNKA      | -0.673                 | -0.611   |            |          |                    |          |                       |          |
| DPCR1       |                        |          |            |          |                    | -0.572   |                       |          |
| CLDN1       | -0.58                  | -0.693   |            |          |                    |          |                       |          |
| FGA         | -0.626                 | -0.677   |            |          |                    |          |                       |          |
| FLJ42875    | -0.592                 |          |            |          |                    |          |                       |          |
| GKN1        |                        |          |            |          | -0.573             | -0.606   |                       |          |
| KCNJ16      |                        | -0.580   |            |          |                    |          |                       |          |
| KLK6        |                        |          |            |          | 0.575              | 0.574    |                       |          |
| KLK11       |                        | -0.709   |            |          |                    |          |                       |          |
| MFSD4       | -0.652                 |          |            |          |                    |          |                       |          |
| RAP1GAP     |                        |          |            |          |                    |          |                       | 0.574    |
| REP15       |                        |          |            |          |                    | -0.577   |                       |          |
| RPRM        | -0.680                 | -0.719   | 0.579      |          |                    |          |                       |          |
| SCGB2A1     |                        |          |            |          | -0.587             |          |                       |          |
| SH3GL2      | -0.732                 | -0.629   | 0.572      |          |                    |          |                       |          |
| SOSTDC1     |                        |          |            |          | -0.571             | -0.594   |                       |          |
| SOX21       |                        |          |            |          | -0.606             | -0.596   |                       |          |
| TMED6       | -0.578                 | -0.616   |            |          |                    |          |                       |          |
| TRIM50      | -0.708                 | -0.693   |            |          |                    |          |                       |          |
